# Supplementary material
Source: publisher figshare collection journal article supplement (https://asha.figshare.com/articles/dataset/_/14818179)
Supplement: Supplementary file 1 [file 1]

## Supplemental Material S2

### *Fit Statistics of the LPA Models*

| Model      | Classes ( <i>N</i> ) | Log-likelihood   | Degrees of freedom | AIC             | BIC             | Entropy      |
|------------|----------------------|------------------|--------------------|-----------------|-----------------|--------------|
| CID        | 1                    | -2864.455        | 8                  | 5744.910        | 5771.296        | -            |
| CVD        | 1                    | -2864.455        | 8                  | 5744.910        | 5771.296        | -            |
| CIU        | 1                    | -2632.496        | 4                  | 5292.991        | 5339.168        | -            |
| CVU        | 1                    | -2632.496        | 14                 | 5292.991        | 5339.168        | -            |
| CID        | 2                    | -2688.901        | 13                 | 5403.802        | 5446.680        | 0.940        |
| CVD        | 2                    | -2468.245        | 17                 | 4970.491        | 5026.562        | 0.961        |
| CIU        | 2                    | -2581.716        | 19                 | 5201.432        | 5264.100        | 0.922        |
| CID        | 3                    | -2560.029        | 18                 | 5156.058        | 5215.427        | 0.944        |
| CVD        | 3                    | -2325.782        | 26                 | 4703.565        | 4789.321        | 0.937        |
| CID        | 4                    | -2464.205        | 23                 | 4974.410        | 5050.272        | 0.966        |
| <b>CIU</b> | <b>4</b>             | <b>-2414.027</b> | <b>29</b>          | <b>4886.055</b> | <b>4981.706</b> | <b>0.944</b> |
| CID        | 5                    | -2410.478        | 28                 | 4876.957        | 4969.310        | 0.972        |
| CIU        | 5                    | -2373.912        | 34                 | 4815.825        | 4927.968        | 0.969        |

*Note.* LPA = latent profile analysis; AIC = Akaike's information criteria; BIC = Bayesian information criteria; CID = class-invariant diagonal, that is, uncorrelated items and equal indicator variances across classes; CVD = class-varying diagonal, that is, uncorrelated items and freely estimated indicator variances across classes; CIU = class-invariant unrestricted, that is, correlated items and equal indicator variances across classes; CVU = class-varying unrestricted, that is, correlated items and freely estimated indicator variances across classes. Only models that achieved convergence are reported.
