# Supplementary material
Source: publisher figshare collection journal article supplement (https://asha.figshare.com/articles/dataset/_/14818179)
Supplement: Supplementary file 2 [file 1]

## Supplemental Material S1

*Questions of the Italian version of the MB-CDI Words and Sentences Short Form (Caselli et al., 2015) addressing the presence/absence of communicative gestures, decontextualized comprehension, verbal imitation, phonological accuracy, and symbolic play.*

- Gesture production:
  - “Does he/she use communicative gestures in order to name or to request?” (e.g., for a conventional gesture—“the child raises the palms to indicate ‘all gone’”—or for a representational gesture—“the child holds an empty fist to the ear for telephone”).
  - “Does he/she point to an object he/she wants?” or
  - “Does he/she point to a picture or an object that he/she pays attention to in order to name it?”
- Decontextualized comprehension: “Does he/she understand when you speak about past and future events?”
- Verbal imitation: “Does he/she repeat words just pronounced by an adult?”
- Phonological accuracy: “How is the speech of the child?” Three response options were given:
  - “He/she speaks like an adult” (i.e., complete phonological accuracy), or
  - “He/she produces simplified words” (i.e., partial phonological accuracy), or
  - “His/her words are comprehended only by caregivers” (i.e., absence of phonological accuracy).
- Symbolic play: “Does he/she use an object pretending to be another object with a different function” (e.g., “Does he/she use a stick as a spoon?”).
