# Supplementary material
Source: publisher figshare collection journal article supplement (https://asha.figshare.com/articles/dataset/_/14818179)
Supplement: Supplementary file 3 [file 1]

### Supplemental Material S3

*Estimated means, standard errors, and 95% confidence intervals of word comprehension, word production, incomplete sentences, and complete sentences across the four latent profiles.*

| Profile                     | Estimated mean | SE   | 95% CI          |
|-----------------------------|----------------|------|-----------------|
| <b>Word comprehension</b>   |                |      |                 |
| Poor                        | 87.41          | 1.44 | [84.58, 90.25]  |
| Weak                        | 96.01          | 1.44 | [93.19, 98.83]  |
| Average                     | 97.37          | 1.40 | [94.64, 100.11] |
| Advanced                    | 99.43          | 1.15 | [97.19, 101.68] |
| <b>Word production</b>      |                |      |                 |
| Poor                        | 19.71          | 2.24 | [15.32, 24.10]  |
| Weak                        | 59.24          | 2.38 | [54.58, 63.90]  |
| Average                     | 82.98          | 2.34 | [78.40, 87.57]  |
| Advanced                    | 91.46          | 1.78 | [87.96, 94.96]  |
| <b>Incomplete sentences</b> |                |      |                 |
| Poor                        | 1.74           | 0.25 | [1.26, 2.22]    |
| Weak                        | 9.72           | 0.27 | [9.18, 10.25]   |
| Average                     | 4.66           | 0.29 | [4.09, 5.23]    |
| Advanced                    | 0.41           | 0.21 | [-0.01, 0.83]   |
| <b>Complete sentences</b>   |                |      |                 |
| Poor                        | 0.12           | 0.18 | [-0.23, 0.46]   |
| Weak                        | 1.53           | 0.22 | [1.10, 1.96]    |
| Average                     | 6.99           | 0.26 | [6.48, 7.50]    |
| Advanced                    | 11.54          | 0.17 | [11.21, 11.87]  |

*Note.* SE = standard error; CI = confidence interval.
